# Supplementary material
Source: PubMed Central journal article supplement (PMC2629188)
Supplement: 0810956106_0810956106SI.pdf [file 0810956106_0810956106SI.pdf]

# Supporting Information

Dubrovskaja et al. 10.1073/pnas.0810956106

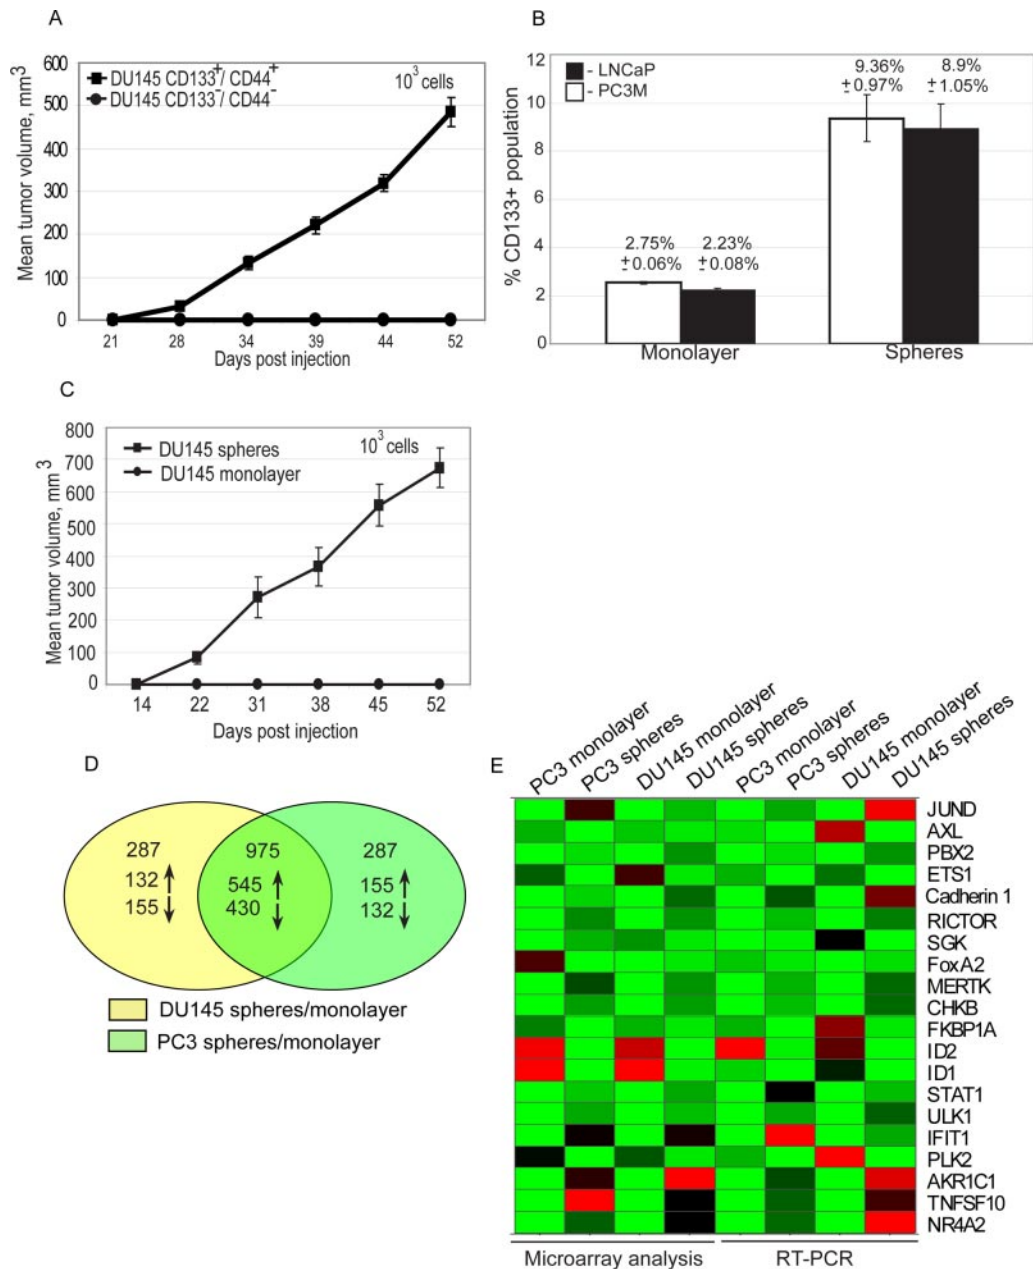

**Fig. S1.** Characterization of sphere-derived tumor initiating cells. (A) FACS-sorted CD133<sup>+</sup>/CD44<sup>+</sup> cells produced tumors in NOD/SCID mice with s.c. injection of 1,000 cells embedded in matrigel. CD133<sup>-</sup>/CD44<sup>-</sup> cells did not develop tumors when injected into NOD/SCID mice. (B) Percent CD133<sup>+</sup> cells in LNCaP and PC3M prostate cancer cell lines grown under sphere and monolayer conditions. (C) Secondary tumor formation. Tumors derived from DU145 cells grown under sphere-forming and monolayer conditions were subjected to enzymatic dissociation, and 1,000 cells were reinjected s.c. into NOD/SCID mice. (D) Venn diagram representing gene expression sets for the 2 analyzed cell lines. The circles represent the number of differentially regulated genes in both cell lines (DU145 and PC3) grown under sphere-forming and monolayer conditions. The overlapping area represents the number of genes that had similar differential regulation for the 2 cell lines. The arrows indicate the change in gene expression for the cells grown under sphere-forming conditions as compared with the cells grown under monolayer conditions. (E) RT-PCR confirmation of differential expression data obtained from microarray analysis of cells grown under sphere-forming conditions compared with cells grown under monolayer conditions. (F) Functional clustering of the differentially regulated genes: 9% of identified proteins have been previously described as stem cell regulators. Overlay of canonical networks showing the PI3K pathway as a top network represented by 25 differentially regulated genes.

F

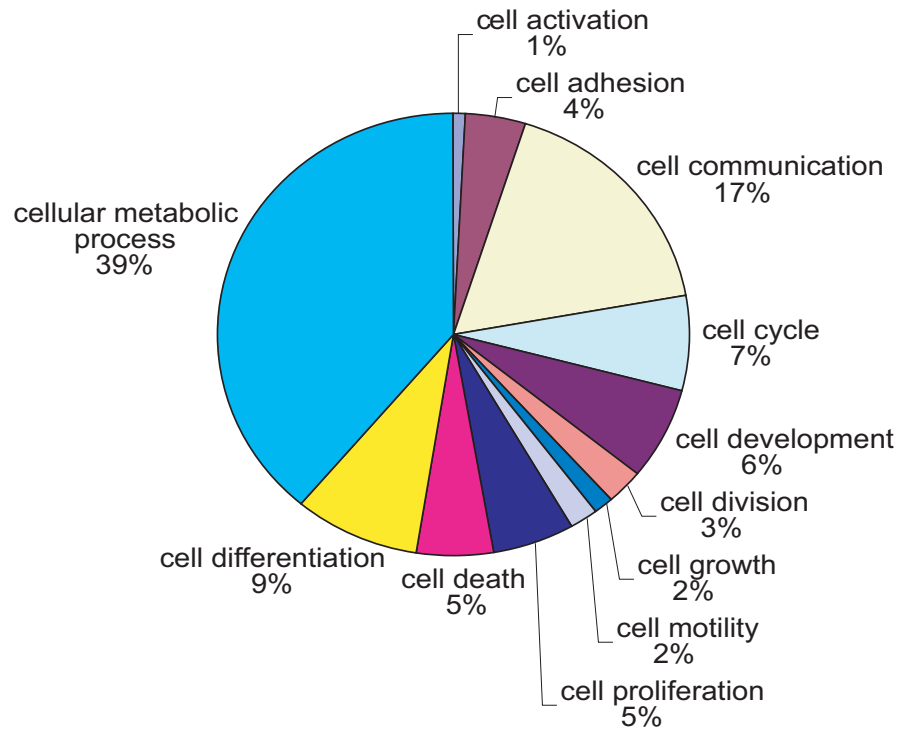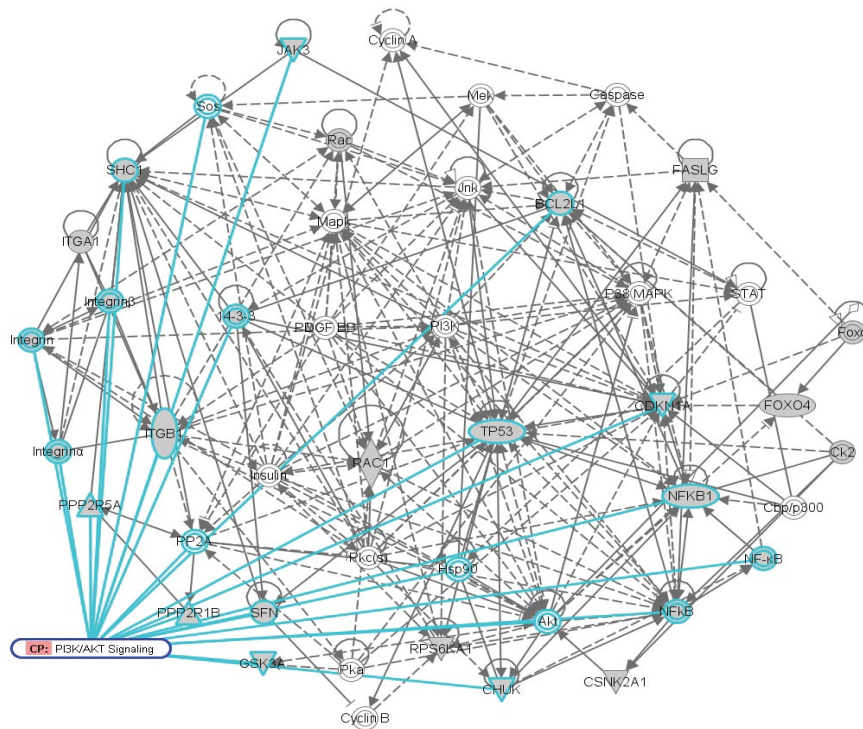

Fig. S1 Continued.





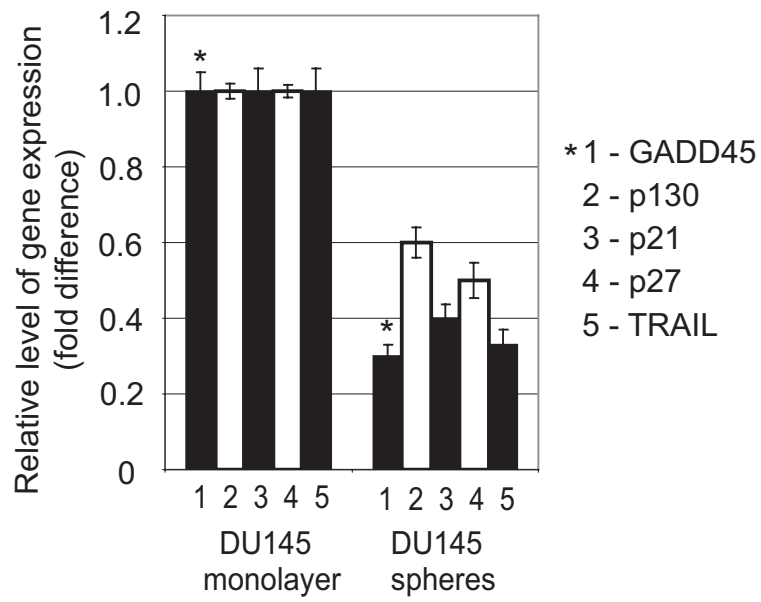

Fig. S4. RT-PCR analyses of transcriptional targets of FoxO3a in DU145 cells grown under sphere-forming and monolayer conditions.

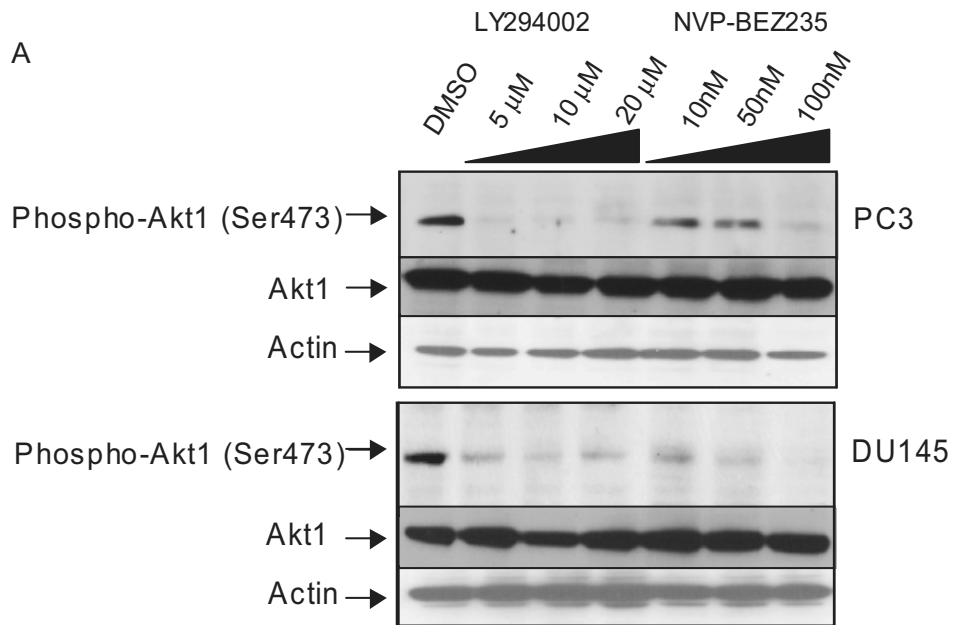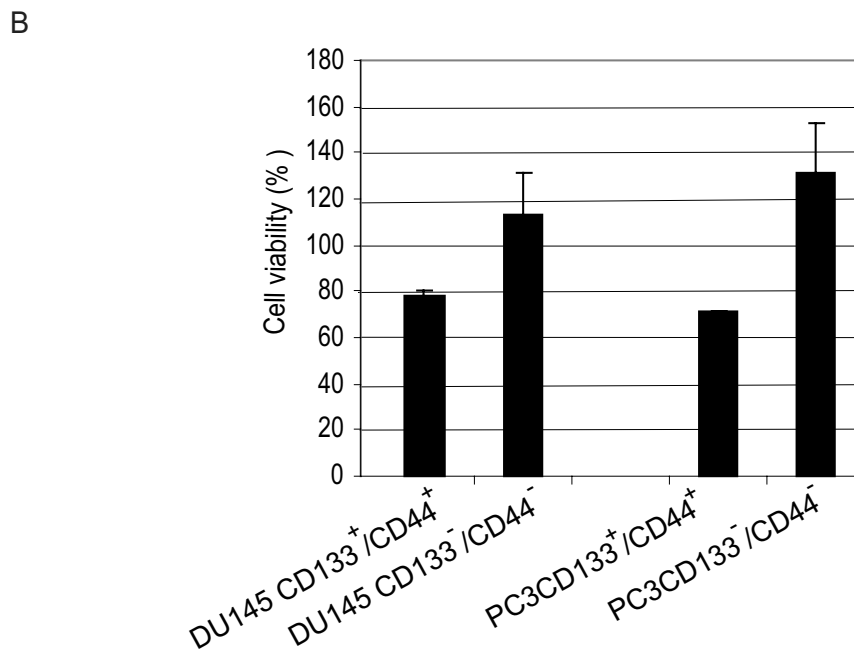

**Fig. S5.** Effects of PI3K inhibitors on DU145 and PC3 cells. (A) Inhibition of Akt1 phosphorylation in DU145 and PC3 cells treated with the PI3K inhibitors LY294002 and NVP-BEZ235. DU145 and PC3 cells were grown in serum-free epithelial basal medium with supplements and treated with the indicated concentrations of LY294002, NVP-BEZ235, or DMSO. On the third day, the cells were subjected to Western blot analysis. (B) Effect of LY294002 on viability of CD133<sup>+</sup>/CD44<sup>+</sup> and CD133<sup>-</sup>/CD44<sup>-</sup> prostate cancer cells. FACS-sorted CD133<sup>+</sup>/CD44<sup>+</sup> and CD133<sup>-</sup>/CD44<sup>-</sup> DU145 and PC3 cells were treated with LY294002 at concentration 5  $\mu$ M for 48 h, and cell viability was measured by Cell Titer Glo assay (Promega).

## Other Supporting Information Files

[Table S1 \(XLS\)](#)

[Table S2 \(XLS\)](#)
